# Supplementary material
Source: PubMed Central journal article supplement (PMC8551685)
Supplement: mmc1.pdf [file mmc1.pdf]

### Supplementary appendix 1

This translation in Amharic was submitted by the authors and we reproduce it as supplied. It has not been peer reviewed. *The Lancet's* editorial processes have only been applied to the original in English, which should serve as reference for this manuscript.

ይህ የአማርኛ ትርጉም ተመራማሪዎቹ ባዘጋጁት መሰረት የቀረበ እና በሌላ ወገን ያልተገመገመ መሆኑን እናስገነዝባለን። በላንሴት የአርትዖት ሂደቶች የተገመገመው በእንግሊዝኛ ቋንቋ የቀረበው ጽሑፍ ብቻ በመሆኑ ለዚህ ጽሑፍ ማጣቀሻ ሆኖ ማገልገል ያለበት በእንግሊዝኛ የተዘጋጀ መሆኑን እናሳስባለን።

Supplement to: Gudina EK, Ali S, Girma E, et al. Seroepidemiology and model-based prediction of SARS-CoV-2 in Ethiopia: longitudinal cohort study among front-line hospital workers and communities. *Lancet Glob Health* 2021; **9**: e1517–27.

**Title:**

**የኮሮና ቫይረስ ወረርሽኝ ስርጭትና ትንበያ በኢትዮጵያ፡ የፊት መስመር ሆስፒታል ሠራተኞች እና ማህበረሰብ ላይ የተደረገ ጥናት**

**Summary**

የኮሮና ቫይረስ ወረርሽኝ (ኮቪድ-19) ወደ ኢትዮጵያ መግባቱ ከተረጋገጠ ከአመት በላይ ቢሆንም የበሽታው ስርጭት እስካሁን በውል አይታወቅም። በመሆኑም ለቫይረሱ በተለየ ሁኔታ ተጋላጭ የሆኑት የፊት መስመር ሆስፒታል ሠራተኞች እና በከተማና ገጠር የሚኖሩ ማህበረሰቦች ላይ የበሽታውን ምጣኔ በማጥናት በሀገርቱ ያለውን የወረርሽኝ ስርጭት መጠን መረዳት ያስፈልጋል። በዚህም መሰረት፡ ጅምር ከተማ እና በዙሪያው የሚገኙ የገጠር ነዋሪዎች እንዲሁም የጅምር ሕክምና ማዕከል ጤና ክብካቤ ሠራተኞች፣ በአዲስ አበባ ከተማ ነዋሪዎች እና የቅዱስ ጳውሎስ ሆስፒታል ጤና ክብካቤ ሠራተኞች ላይ ሶስት ዙር ተከታታይ የዳሰሳ ጥናት ተደርጓል። በዚህ ጥናት፤ በቫይረሱ የተጠቁ ተሳታፊዎች የተለዩት በኮሮና ቫይረስ የተጠቃ ማንኛውም ሰው ውስጥ ሊመረት የሚችለውን ጸረ-ቫይረስ (አንቲቦዲ) ማወቅ በሚያስችል የምርመራ ዘዴ ነው።

ይህ ዳሰሳ ጥናት የኮቪድ-19 ወረርሽኝ በኢትዮጵያ በከፍተኛ ፍጥነት የተሰራጨ መሆኑን ያመለክታል። ለምሳሌ፡ በቅዱስ ጳውሎስ ሆስፒታል ጤና ክብካቤ ሠራተኞች መካከል የነበረው የቫይረሱ ስርጭት ምጣኔ በነሃሴ 2012 ዓ/ም 10.9% የነበረ ሲሆን የካቲት 2013 ላይ 53.7% ሊደርስ ችሏል። በዚህ ወቅት ለቫይረሱ ተጋላጭ ከነበሩ 100,000 ሰዎች ባማካይ 2223 ሰዎች በየሳምንቱ በቫይረሱ ሲያዙ እንደነበር ያሳያል። በተመሳሳይ ሁኔታ፡ በጅምር ሕክምና ማዕከል ጤና ክብካቤ ሠራተኞች መካከል ህዳር 2013 ላይ 30.8% የነበረው የስርጭት ምጣኔ የካቲት 2013 ላይ 56.1% ደርሷል። ይህም ለቫይረሱ ተጋላጭ ከነበሩ 100,000 ሰዎች መካከል ባማካይ 3810 ሰዎች በየሳምንቱ በቫይረሱ ሲያዙ እንደነበር ያመለክታል። በተያያዘ ሁኔታ፡ በአዲስ አበባና ጅምር ከተሞች ከጥር እስከ መጋቢት 2013 ዓ/ም ብቻ የስርጭት ምጣኔው 40% ጭማሪ አሳይቷል። በተለይም በአዲስ አበባ ከተማ ስርጭቱ ከፍተኛ የነበረ ሲሆን ለቫይረሱ ተጋላጭ ከነበሩ 100,000 ሰዎች ባማካይ 4646 ሰዎች በየሳምንቱ በቫይረሱ ሲያዙ እንደነበር ጥናቱ ያሳያል። በሌላ በኩል በገጠር ማህበረሰብ ውስጥ የነበረው ምጣኔ በህዳር 2013 ዓ/ም 18% የነበረው መጋቢት 2013 ላይ 31% መድረሱን ያመለክታል።

ባጠቃላይ፡ የኮቪድ -19 ወረርሽኝ በኢትዮጵያ በተለይ በጤና ክብካቤ ሠራተኞች እና ከተማ ነዋሪዎች መካከል በከፍተኛ ፍጥነት እየተሰራጨ መሆኑ ለማወቅ ተችሏል። በተያያዘም የቫይረሱ ስርጭት በሰፊው ገጠራማ ቦታዎች ገና እየተስፋፋ በመሆኑ ወደፊት የጤና አገልግሎት ሰጪ ተቋማት ላይ ከፍተኛ ጭና እንዳያሳድር ከወዲሁ መጠነ-ሰፊ የበሽታ መከላከል ስራ ሊሰራ ይገባል።
