# Supplementary material
Source: PubMed Central journal article supplement (PMC8551685)
Supplement: mmc2.pdf [file mmc2.pdf]

# THE LANCET

## Global Health

### Supplementary appendix 2

This translation in Afan Oromo was submitted by the authors and we reproduce it as supplied. It has not been peer reviewed. *The Lancet's* editorial processes have only been applied to the original in English, which should serve as reference for this manuscript.

Hiikkaan Afaan Oromoon dhihaate kun barreessitoota qorannoo kanaan kan qophaa'ee fi qaama biraatiin kan hin gulaalamne dha. Sirna qopheessaa Laanseetiin kan gulaalame kan Afaan Ingliziin dhihaate qofa waan ta'eef maddi barreeffama kanaa akka isa ta'e hubachiisuu feena.

Supplement to: Gudina EK, Ali S, Girma E, et al. Seroepidemiology and model-based prediction of SARS-CoV-2 in Ethiopia: longitudinal cohort study among front-line hospital workers and communities. *Lancet Glob Health* 2021; **9**: e1517–27.

## Title:

**Babal'inaa fi raaga weerara dhibee Koronaavaayirasii Itoophiyaatti: Qorannoo hojjettoota hospitaalaa fi uummata irratti godhame**

## Summary:

Weerarri dhibee Koronaavaayirasii (COVID-19) erga biyya Itoophiyaa keessatti mirkaneeffamee waggaa tokkoo ol ta'us waa'een babal'ina dhibee kanaa ammayyuu sirriitti hin beekamu. Kanaaf warreen dhibee kanaaf halaa addaan saaxilaman keessumattuu hojjettoota hospitaalaa, jiraattota magaalaa fi baadiyyaa qorachuun babal'ina weerara kanaa baruuf barbaachisaa dha. Haaluma kanaan, jiraattota Magaalaa Jimmaa, Magaalaa Finfinnee, baadiyyaalee Godina Jimmaa, akkasumas tajaajiltoota wal'aansa fayyaa Giddu-gala Wal'aansa Fayyaa Jimmaa fi kan Finfinneetti argamu Hospitaala Paawulos irratti qorannoo marsaa sadii raawwatnee jirra. Qorannoo kanarratti namni Koronavaayirasiin qabamuusaa kan beekame dandamata (antibody) namni vaayirasii kanaan qabame oomishu qorachuudhaani.

Weerarri dhibee Koronaavaayirasii Itoophiyaatti saffisaan babal'achaa akka jiru qorannoon kun ni mul'isa. Fakkeenyaaf, hojjettoota Hospitaala Paawuloos keessaa Hagayya 2012 ALI'tti babal'inni dhibee kanaa 10.9% kan ture yoo ta'u Guraandhala 2013'tti 53.7% gahuu dandaheera. Kana jedhuun namoota dhibee kanaaf saaxilaman 100,000 keessaa 2223 torbee torbeen akka vaayirasii kanaan qabaman agarsiisa. Haaluma wal-fakkaatuun, hojjettoota Giddu-gala Wal'aansa Fayyaa Jimmaatti Sadaasa 2013'tti 30.8% kan ture baa'ini dhibee kanaa Guraandhala 2013'tti 56.1% qaqqabeera. Kunis kan agarsiisu namoota 100,000 keessaa 3810 torbee torbeen akka vaayirasii kanaan qabamani. Kanumaan wal-qabatee qorannoon jiraatota Magaalota Finfinnee fi Jimmaa kan agarsiisu babal'inni weerara kanaa Amajjii hanga Bitootessa 2013'tti 40% akka dabale dha. Keesumattuu Magaalaa Finfinneetti dhibeen kun baayyee kan faffaca'ee yoo ta'u namoota 100,000 keessaa 4646 torbeetti dhibee kanaan akka qabamaa turan agarsiisa. Karaa biraatiin, baadiyyaa keessatti Sadaasa 2013 dhibeen kun 18% qofa kan ture Bitootessa 2013'tti 31% gaheera.

Walumma galatti, weerarri Koronaavaayirasii Itoophiyaatti keesumattuu tajaajiltoota wal'aansa fayyaa fi jiraattota magaalaa keessatti baa'inaan kan babal'achaa jiru ta'uun beekameera. Karaa biraatiin dhibeen kun baadiyyaa biyyatti irra-guddeessa keessatti babal'achuu jalqabaa kan jiru yoo ta'u gara-fuuldurattii dhaabilee tajaajila wal'aansa fayyaa irratti dhiibbaa guddaa akka hin fidneef daddarbii dhibee kanaa ittisuuf hojii guddaa ni barbaachisa.
