# Supplementary material
Source: PubMed Central journal article supplement (PMC8551685)
Supplement: mmc3.pdf [file mmc3.pdf]

# THE LANCET

## Global Health

### Supplementary appendix 3

This appendix formed part of the original submission and has been peer reviewed. We post it as supplied by the authors.

Supplement to: Gudina EK, Ali S, Girma E, et al. Seroepidemiology and model-based prediction of SARS-CoV-2 in Ethiopia: longitudinal cohort study among front-line hospital workers and communities. *Lancet Glob Health* 2021; **9**: e1517–27.

## Supplementary Material

### 1. Prevalence and Incidence Estimation

#### Supplementary methods

A two-way, repeated measures ANOVA model was used to examine the effect of population group and time point on the number of seropositive individuals. The variability explained by the model is divided into two factors: Group (Jimma vs. Addis Ababa and HCW vs Community; between-subjects factor indicating population group) and Round (1, 2, 3; within-subjects factor denoting time point of the serology test); and an interaction term Group:Round testing whether the effect of Round and Group jointly influences the seropositive count, i.e. if some groups have a differential effect in specific rounds.

$$y = \alpha + \beta_1 \text{Group} + \beta_2 \text{Round} + \beta_3 \text{Group:Round} + \varepsilon$$

In this case,  $y$  refers to the count of seropositives (pos) within each group and survey round and we have the following equations to estimate  $p_i$  which is the probability of positive in a group and round.

$$pos_i \sim \text{Binomial}(n_i, p_i)$$

$$\text{logit}(p_i) = \alpha + \beta_1 \text{Group} + \beta_2 \text{Round} + \beta_3 \text{Group:Round}$$

$$\alpha, \beta_i \sim \text{Normal}(0,10)$$

In addition to considering binomial outcomes, we also examined the count of seropositives assuming a Poisson outcome distribution. The equations are similar to the binomial distribution except for the need to have an offset variable adjusting for the denominator to estimate the rate  $\lambda_i$  for being positive.

$$pos_i \sim \text{Normal}(\lambda_i)$$

$$\text{log}(\lambda_i) = \alpha + \beta_1 \text{Group} + \beta_2 \text{Visit} + \beta_3 \text{Group:Visit} + \text{offset}(n_i)$$

$$\alpha, \beta_i \sim \text{Normal}(0,10)$$

Estimates of the counts along with the 95% Credible Intervals were obtained using non-informative priors (normal distribution with mean zero and standard deviation 10) with 5000 warm-up samples followed by 5000 MCMC samples for the posterior outcome of a generalized linear model using the brms (Bayesian Regression Models using 'Stan') package in R.<sup>1,2,3</sup> The prevalence estimates are obtained by dividing the estimated count for positives by the observed samples. In case of the sero-incidence measures we have the count of new positives instead of positives and there is no component of round. Instead, the denominator is person-weeks of being observed within the study. The above models were also used to estimate the contrasts to check group wise and/or round wise differences. We published the code and tables used in this paragraph at Zenodo.<sup>4</sup>

#### Supplementary results for incidence and prevalence estimation

**Table S1: SARS-CoV-2 seroincidence rates per person-weeks for HCW at Jimma Medical Center and St. Paul's Hospital, and communities from Jimma and Addis Ababa**

|                                 | New seropositives (N) | Person-weeks | Seroincidence rates per 100,000 person-weeks (95% CI) |
|---------------------------------|-----------------------|--------------|-------------------------------------------------------|
| HCW Jimma Medical Center        | 111                   | 2913         | 3810 (3149, 4540)                                     |
| HCW St. Paul's Hospital         | 90                    | 4051         | 2223 (1785, 2696)                                     |
| Jimma Community Combined        | 44                    | 2556         | 1720 (1258, 2258)                                     |
| Jimma Rural                     | 23                    | 1261         | 1824 (1157, 2727)                                     |
| Jimma Urban                     | 21                    | 1295         | 1622 (1004, 2479)                                     |
| Addis Ababa Community Combined* | 46                    | 1017         | 4535 (3372, 5906)                                     |
| Yeka sub-city                   | 24                    | 557          | 4309 (2761, 6412)                                     |
| Addis Ketema sub-city           | 19                    | 409          | 4646(2797, 7255)                                      |

\*New seropositives and person-weeks from Yeka and Addis Ketema sub-cities do not add up due to missing data for sub-city.

CI – Credible Interval; HCW – Healthcare worker

Between cohorts, we observed statistically significant differences for seroincidence and seroprevalence during different survey periods (Table S2). For seroprevalence over time, we do not see much difference between Round 1 and Round 2 except for Addis HCW, which is by design and expected. However, the difference to Round 3 is statistically significant (Table S3).

**Table S2: Difference in the seroincidence and seroprevalence during survey periods between communities and health care workers (HCW) observed in Addis Ababa and Jimma.**

| Seroincidence (HCW)                       | RR (95% CI)†    |
|-------------------------------------------|-----------------|
| Addis community versus Jimma community    | 2.6 (1.6; 3.8)* |
| Addis HCW versus Jimma HCW                | 0.6 (0.4; 0.7)* |
| Addis community versus Addis HCW          | 2.0 (1.4; 2.8)* |
| Jimma community versus Jimma HCW          | 0.4 (0.3; 0.6)* |
| Seroprevalence (Addis Ababa)              | OR (95% CI)†    |
| <b>December 2020/January 2021</b>         |                 |
| Addis Ketema (R1) versus Addis Yeka (R1)  | 1.8 (1.2; 2.6)* |
| Addis Ketema (R1) versus Addis HCW (R2)‡  | 1.5 (1.1; 2.1)* |
| Addis Yeka (R1) versus Addis HCW (R2)‡    | 0.8 (0.6; 1.2)  |
| <b>February 2021/March 2021</b>           |                 |
| Addis Ketema (R2) versus Addis Yeka (R2)  | 1.6 (1.0; 2.5)* |
| Addis Ketema (R2) versus Addis HCW (R3)‡  | 1.2 (0.8; 2.1)  |
| Addis Yeka (R2) versus Addis HCW (R3)‡    | 0.7 (0.4; 1.1)  |
| <b>April 2021</b>                         |                 |
| Addis Ketema (R3) versus Addis Yeka (R3)‡ | 2.2 (1.3; 3.3)* |
| Seroprevalence Jimma                      |                 |
| <b>November 2020/December 2021</b>        |                 |
| Jimma City (R1) versus Jimma Rural (R1)   | 2.2 (1.4; 3.2)* |
| Jimma City (R1) versus HCW (R1)           | 1.1 (0.7; 1.4)  |
| Jimma Rural (R1) versus HCW (R1)          | 0.5 (0.3; 0.7)* |
| <b>January 2021/February 2021</b>         |                 |
| Jimma City (R2) versus Jimma Rural (R2)   | 1.9 (1.1; 3.0)* |
| Jimma City (R2) versus Jimma HCW (R2)     | 0.8 (0.6; 1.1)  |
| Jimma Rural (R2) versus Jimma HCW (R2)    | 0.4 (0.3; 0.6)* |
| <b>February 2021/March</b>                |                 |
| Jimma City (R3) versus Jimma Rural (R3)   | 1.8 (0.9; 2.9)  |
| Jimma City (R3) versus Jimma HCW (R3)     | 0.6 (0.4; 0.9)* |
| Jimma Rural (R3) versus Jimma HCW (R3)    | 0.3 (0.2; 0.5)* |

†Estimate –ratio for the comparison of the contrasts, RR=risk ratio for seroincidence, OR=odds ratio for seroprevalence  
\* Statistically significant; R= survey round

**Note:** in order to compare seroprevalences between cohorts, we applied periods instead of round. This distinction was made as in Addis Ababa survey rounds in HCW did not match those of the corresponding communities in terms of time periods (initiated with ‡). In April, no matching HCW information from Addis was available.

**Table S3: Difference in the seroprevalence over the different rounds for the overall population and by cohort**

| Effects                                        | Odds Ratio* | Lower 95%CI | Upper 95% CI | Statistically significant difference |
|------------------------------------------------|-------------|-------------|--------------|--------------------------------------|
| Intercept                                      | 1.403       | 1.020       | 1.937        | -                                    |
| Yeka Sub-city                                  | 0.597       | 0.379       | 0.935        | Yes                                  |
| Jimma City                                     | 0.490       | 0.316       | 0.755        | Yes                                  |
| Jimma Rural                                    | 0.252       | 0.152       | 0.414        | Yes                                  |
| Jimma Medical Center                           | 0.598       | 0.410       | 0.865        | Yes                                  |
| St. Paul's Hospital Addis                      | 0.549       | 0.371       | 0.814        | Yes                                  |
| <b>Overall Round 1</b>                         | 0.840       | 0.551       | 1.259        | No                                   |
| Yeka Sub-cityRound1 (interaction)              | 0.935       | 0.523       | 1.704        | No                                   |
| Jimma City Round1 (interaction)                | 0.825       | 0.470       | 1.443        | No                                   |
| Jimma Rural Round1 (interaction)               | 0.737       | 0.386       | 1.433        | No                                   |
| Jimma Medical Center Round1 (interaction)      | 0.631       | 0.387       | 1.031        | No                                   |
| St. Paul's Hospital Addis Round1 (interaction) | 0.187       | 0.108       | 0.323        | Yes                                  |
| <b>Overall Round 3</b>                         | 1.918       | 1.213       | 3.047        | Yes                                  |
| AddisYeka Round3 (interaction)                 | 0.755       | 0.403       | 1.414        | No                                   |
| Jimma City Round3 (interaction)                | 0.624       | 0.337       | 1.161        | No                                   |
| Jimma Rural Round3 (interaction)               | 0.657       | 0.318       | 1.359        | No                                   |
| Jimma Medical Center Round3 (interaction)      | 0.798       | 0.464       | 1.369        | No                                   |
| St. Paul's Hospital Addis Round3 (interaction) | 0.788       | 0.420       | 1.460        | No                                   |

\*Round 2 is reference category; Addis Ketema is reference site

In the above table, we see that the interaction effects are not significantly different except for the Round 1 at St. Paul's Hospital (Addis Ababa), which is a design effect. Overall, ignoring the interaction effect, we observed no significant difference between Round 1 and Round 2; however, Round 3 compared to Round 2 had an overall increase (OR 1.918 with 95% Credible Interval (1.213-3.047)). We also observe that within Round 2, Addis Ketema sub-city had the highest seroprevalence as compared all the other cohort groups.

## 2. The Models

We considered three different models for the analysis of the virus spread in Ethiopia: A simple SEIR model (which was applied separately to data for *healthcare workers (H)* or *community members (C)*), an extended SEIR model which simultaneously described the populations for healthcare worker and community members, and an SEIR model which

allows for the original virus (wt) and a virus variant (va). We chose SEIR models due to their widespread use for the study of the Covid-19 progression,<sup>5-9</sup> which facilitates a comparison to related work. Furthermore, we established earlier a comprehensive analysis pipeline for these types of models.<sup>10</sup> In all these models, the populations are split into *Susceptible (S)*, *Exposed (E)*, *Infectious (I)* and *Recovered (R)*. To compare the model simulations to the observed seroprevalence, we compute the ratio of recovered to total population.

### a) SEIR model

The model structure is depicted in Figure 4A and the corresponding ordinary differential equations (ODEs) for the time-dependent size of the compartments are:

$$\begin{aligned} \dot{S} &= -\frac{\beta I}{N} S & S(0) &= 510 \\ \dot{E} &= \frac{\beta I}{N} S - \kappa E & E(0) &= 0 \\ \dot{I} &= \kappa E - \gamma I & I(0) &= I_0 \\ \dot{R} &= \gamma I & R(0) &= 0 \\ N &= S + E + I + R. \end{aligned}$$

The parameters are listed in Table S4. This table includes the respective names in the PETA model which we published at Zenodo.<sup>4</sup>

Table S4: Parameters of the SEIR model. Some depend on study site, i.e. Jimma and Addis Ababa.

| Parameter     | Description  | Sampling result - Median (CI 95%)      | Scale used for sampling | Prior (in scale) | Est. Start Sampling | Unit                   |
|---------------|--------------|----------------------------------------|-------------------------|------------------|---------------------|------------------------|
| $\beta$       | Exp. rate    | 0.08 (0.06, 0.13)                      | $\log_{10}$             | $U(-5, 1)$       | 0.09                | $\frac{1}{\text{day}}$ |
| $\kappa^{-1}$ | Inc. period  | 5.6 (2.2, 13.6)                        | $\log$                  | $N(1.63, 0.50)$  | 5.0                 | days                   |
| $\gamma^{-1}$ | Rec. time    | 19.3 (11.4, 28.9)                      | linear                  | $N(15.7, 6.7)$   | 15.0                | days                   |
| $I_0$         | Initial inf. | J: 1.1 (0.3, 3.1)<br>A: 1.2 (0.4, 2.9) | $\log_{10}$             | $U(-1, 3)$       | J: 0.74<br>A: 6.5   | -                      |

### b) Extended SEIR model for two populations

In addition to the dynamics of the individual populations, we account for their interaction: Infectious healthcare workers can expose community members and vice versa. Virus transmission from community members to healthcare workers is supposed to be more probable, which is modeled by a factor  $\alpha > 1$ . The model structure can be seen in Figure 4C and the ODEs are:

$$\begin{aligned} \dot{S}_H &= -\frac{\beta(I_H + \alpha I_C)}{N} S_H & S_H(0) &= 510 \\ \dot{E}_H &= \frac{\beta I_H}{N} S_H - \kappa E_H & E_H(0) &= 0 \\ \dot{I}_H &= \kappa E_H - \gamma I_H & I_H(0) &= 0 \\ \dot{R}_H &= \gamma I_H & R_H(0) &= 0 \\ \dot{S}_C &= -\frac{\beta(I_H + I_C)}{N} S_C & S_C(0) &= 100000 \\ \dot{E}_C &= \frac{\beta I_C}{N} S_C - \kappa E_C & E_C(0) &= 0 \\ \dot{I}_C &= \kappa E_C - \gamma I_C & I_C(0) &= I_0 \\ \dot{R}_C &= \gamma I_C & R_C(0) &= 0 \\ N &= S_H + E_H + I_H + R_H \\ &\quad + S_C + E_C + I_C + R_C. \end{aligned}$$

The parameters are listed in Table S5. This table includes the respective names in the PETA model which we published at Zenodo.<sup>4</sup> All initial states which are not mentioned in the table are set to 0.

Table S5: Parameters of the extended SEIR model. Some depend on study site, i.e. Jimma and Addis Ababa.

| Parameter     | Description        | Sampling result - Median (CI 95%)                | Scale used for sampling | Prior (in scale) | Est. Start Sampling  | Unit                   |
|---------------|--------------------|--------------------------------------------------|-------------------------|------------------|----------------------|------------------------|
| $\beta$       | Exp. rate          | 0.08 (0.06, 0.10)                                | $\log_{10}$             | $U(-5, 1)$       | 0.08                 | $\frac{1}{\text{day}}$ |
| $\kappa^{-1}$ | Inc. period        | 5.4 (2.6, 11.0)                                  | $\log$                  | $N(1.63, 0.50)$  | 5.7                  | days                   |
| $\gamma^{-1}$ | Rec. time          | 19.8 (14.9, 26.3)                                | linear                  | $N(15.7, 6.7)$   | 18.5                 | days                   |
| $\alpha$      | Increased HCW risk | 1.5 (1.3, 1.7)                                   | $\log_{10}$             | $U(-1, 3)$       | 1.5                  | -                      |
| $I_0$         | Initial inf.       | J: 131.4 (56.8, 293.3)<br>A: 204.3 (96.7, 428.2) | $\log_{10}$             | $U(-1, 3)$       | J: 121.9<br>A: 189.9 | -                      |

### c) Virus variant model

This model accounts for the possibility that a virus variant altered characteristics is present in Ethiopia. As sequencing data are missing, we assume the variant to appear at an unknown time  $t_0$  and has a reproduction rate increased by a factor of 1.35, which is in the range of increase observed for variants such as B.1.1.7 and B.1.351. We account for the increase by reducing the recovery rate.<sup>11</sup> Moreover we assume previous variant infections make individuals immune to wild type infections but not the other way around.

The model structure is depicted Figure 5A and the ODEs are:

$$\begin{aligned}
 \dot{S} &= -\frac{\beta I_{wt}}{N} S - \frac{\beta(I_{va} + I_{va}^{wt})}{N} S & S(0) &= 510 \\
 \dot{E}_{wt} &= \frac{\beta I_{wt}}{N} S - \kappa E_{wt} & E_{wt}(0) &= 0 \\
 \dot{E}_{va} &= \frac{\beta(I_{va} + I_{va}^{wt})}{N} S - \kappa E_{va} & E_{va}(0) &= 0 \\
 \dot{E}_{va}^{wt} &= \frac{\beta(I_{va} + I_{va}^{wt})}{N} R_{wt} - \kappa E_{va}^{wt} & E_{va}^{wt}(0) &= 0 \\
 \dot{I}_{wt} &= \kappa E_{wt} - \gamma I_{wt} & I_{wt}(0) &= I_0 \\
 \dot{I}_{va} &= \kappa E_{va} - \frac{\gamma}{1.35} I_{va} & I_{va}(t_0) &= 1 \\
 \dot{I}_{va}^{wt} &= \kappa E_{va}^{wt} - \frac{\gamma}{1.35} I_{va}^{wt} & I_{va}^{wt}(0) &= 0 \\
 \dot{R}_{wt} &= \gamma I_{wt} - \frac{\beta(I_{va} + I_{va}^{wt})}{N} R_{wt} & R_{wt}(0) &= 0 \\
 \dot{R}_{va} &= \frac{\gamma}{1.35} I_{va} & R_{va}(0) &= 0 \\
 \dot{R}_{va}^{wt} &= \frac{\gamma}{1.35} I_{va}^{wt} & R_{va}^{wt}(0) &= 0 \\
 N &= S + E_{wt} + E_{va} + E_{va}^{wt} + I_{wt} \\
 &\quad + I_{va} + I_{va}^{wt} + R_{wt} + R_{va} + R_{va}^{wt}.
 \end{aligned}$$

The parameters are listed in Table S6. This table includes the respective names in the PETab model which we published at Zenodo.<sup>4</sup>

**Table S6: Parameters of the virus variant model. Some depend on study site, i.e. Jimma and Addis Ababa.**

| Parameter        | Description      | Sampling result - Median (CI 95%)        | Scale used for sampling | Prior (in scale)          | Est. Start Sampling | Unit                   |
|------------------|------------------|------------------------------------------|-------------------------|---------------------------|---------------------|------------------------|
| $\beta$          | Exp. rate        | 0.08 (0.06, 0.10)                        | $\log_{10}$             | $\mathcal{U}(-5, 1)$      | 0.08                | $\frac{1}{\text{day}}$ |
| $\kappa^{-1}$    | Inc. period      | 5.0 (2.4, 10.0)                          | $\log$                  | $\mathcal{N}(1.63, 0.50)$ | 5.3                 | days                   |
| $\gamma^{-1}$    | Rec. time        | 16.7 (12.9, 22.1)                        | linear                  | $\mathcal{N}(15.7, 6.7)$  | 17.2                | days                   |
| $t_0$            | Entry va         | 184.5 (152.6, 231.3)                     | linear                  | $\mathcal{U}(150, 360)$   | 170.3               | days                   |
| $s_{\text{TPR}}$ | Scaling nat. TPR | J: 2.3 (1.5, 3.6)<br>A: 2.8 (1.7, 4.3)   | $\log_{10}$             | $\mathcal{U}(-1, 3)$      | J: 2.3<br>A: 2.7    | -                      |
| $I_0$            | Initial inf.     | J: 1.8 (0.6, 4.9)<br>A: 13.8 (3.6, 42.5) | $\log_{10}$             | $\mathcal{U}(-1, 3)$      | J: 2.2<br>A: 16.2   | -                      |

### d) Calibration workflow

The models were encoded using the Systems Biology Markup Language (SBML)<sup>12</sup> and the Parameter estimation problems were formulated using the Parameter Estimation table (PETab)<sup>13</sup> standard. The two community standards allow for the direct reproduction of the result in various software tools.

For parameter estimation, the seroprevalence data for each site, round and study group was each split by month of their collection and then accumulated on the mean date respectively. Standard deviations were calculated assuming binomial distribution in a similar way as described in the paragraph *Prevalence and Incidence Estimation* of this section. The seroprevalence measurement is assumed to not distinguish between infection with original virus or variant. In addition to seroprevalence information, we used for the virus variant model also information about national test positivity rates (TPR). As over a long time the number of test and test strategies remained unchanged, we assumed that the TPR is roughly proportional to the sum of exposed and infectious individuals in the different groups and location. For incubation and recovery times we used priors from literature.<sup>14,15</sup>

Bayesian parameter estimation was performed using the adaptive Metropolis-Hastings algorithm methods implemented in the parameter estimation toolbox pyPESTO<sup>16</sup>. Selected results were confirmed using pyMC3. Simulation was performed using the simulation toolbox AMICI<sup>17</sup>. The sampling results were post-processed, e.g. by removing the burn-in, and convergence was assessed visually and using the Geweke test.

## Supplementary Results for model prediction

The parameter sampling for the SEIR model with healthcare workers data was performed with a sample size of  $1e6$ . Convergence of parameters was achieved after a burn in of  $5e4$  samples.

The parameter sampling for the extended SEIR model for two populations with combined healthcare workers and community data was performed with a sample size of  $1e5$ . Convergence of parameters was achieved without any burn. The parameter sampling for the virus variant model with combined community and national TPR data was performed with a sample size of  $1e5$ . Convergence of parameters was achieved after a burn in of  $1e4$  samples.

The parameter sampling for the SEIR model with combined community members data was performed with a sample size of  $1e6$ . Since the parameters showed alternating behaviour between two models, we refrained from conducting prediction simulations based on this model-data combination.

The parameter sampling for the SEIR model with combined community members data was performed with a sample size of  $1e6$ . Since the parameters showed alternating behaviour between two models, we refrained from conducting prediction simulations based on this model-data combination. For completeness we included these prediction results as Figure S1.

**Figure S1: SEIR model of SARS-CoV-2 epidemic in Ethiopia.**

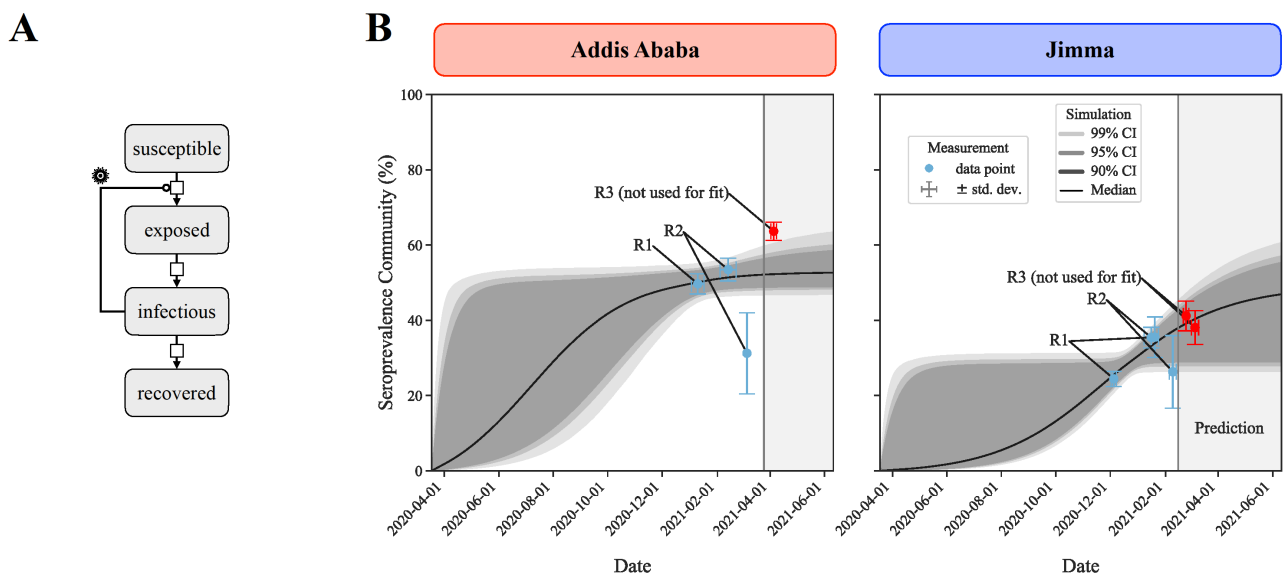

(A) Compartments of the SEIR models and possible transition. (B) Model simulation for Community members in Jimma Medical Center and St. Paul's Hospital. Data from the 1<sup>st</sup> and 2<sup>nd</sup> round was used for model training. Later points, including the 3<sup>rd</sup> round, were predictions.

## 3. Information on missing data

The following tables describe the numbers and percentages of missing data between rounds (A. between Round 1 and Round 2; B (between Round 2 and Round 3); C. between Round 1 and Round 3) and for different cohorts (1. HCW Jimma, 2. urban and rural community combined for Jimma, C. HCW Addis Ababa, D. Addis community combined (Ketema and Yeka). Overall, dropout rates are higher, especially in Addis Ababa as compared to Jimma. However, dropout rates do not significantly differ between seropositive and seronegative population, which indicates that there was no sampling bias over the entire period of the study.

### 1. Jimma Health Care Workers (HCW) Missing Data by Result

A

|          | Round 2  |          |         |       |                   |
|----------|----------|----------|---------|-------|-------------------|
| Round 1  | Negative | Positive | Missing | (all) | Round 2 Missing % |
| Negative | 235      | 66       | 52      | 353   | 14.73%            |
| Positive | 1        | 132      | 24      | 157   | 15.29%            |
| (all)    | 236      | 198      | 76      | 510   |                   |

B

|          | Round 3  |          |         |       |                   |
|----------|----------|----------|---------|-------|-------------------|
| Round 2  | Negative | Positive | Missing | (all) | Round 3 Missing % |
| Negative | 152      | 43       | 41      | 236   | 17.37%            |
| Positive | 3        | 162      | 33      | 198   | 16.67%            |
| Missing  | 7        | 5        | 64      | 76    |                   |
| (all)    | 162      | 210      | 138     | 510   |                   |

C

|          |          | Round 3  |          |         |       |                   |
|----------|----------|----------|----------|---------|-------|-------------------|
| Round 1  | Round 2  | Negative | Positive | Missing | (all) | Round 3 Missing % |
| Negative | Negative | 151      | 43       | 41      | 235   | 17.45%            |
| Negative | Positive | 1        | 55       | 10      | 66    | 15.15%            |
| Negative | Missing  | 7        | 2        | 43      | 52    |                   |
| Negative | (all)    | 159      | 100      | 94      | 353   | 26.63%            |
| Positive | Negative | 1        | 0        | 0       | 1     |                   |
| Positive | Positive | 2        | 107      | 23      | 132   | 17.42%            |
| Positive | Missing  | 0        | 3        | 21      | 24    |                   |
| Positive | (all)    | 3        | 110      | 44      | 157   | 28.03%            |
| (all)    | (all)    | 162      | 210      | 138     | 510   |                   |

## 2. Jimma Community (combined Jimma City and Jimma urban)

A

|          | Round 2  |          |         |       |  | Round 2 Missing % |
|----------|----------|----------|---------|-------|--|-------------------|
| Round 1  | Negative | Positive | Missing | (all) |  |                   |
| Negative | 207      | 31       | 158     | 396   |  | 39.90%            |
| Positive | 4        | 82       | 53      | 139   |  | 38.13%            |
| (all)    | 211      | 113      | 211     | 535   |  |                   |

B

|          | Round 3  |          |         |       |  | Round 3 Missing % |
|----------|----------|----------|---------|-------|--|-------------------|
| Round 2  | Negative | Positive | Missing | (all) |  |                   |
| Negative | 124      | 6        | 81      | 211   |  | 38.39%            |
| Positive | 4        | 78       | 31      | 113   |  | 27.43%            |
| Missing  | 32       | 22       | 157     | 211   |  |                   |
| (all)    | 160      | 106      | 269     | 535   |  |                   |

C

|          |          | Round 3  |          |         |       |  | Round 3 Missing % |
|----------|----------|----------|----------|---------|-------|--|-------------------|
| Round 1  | Round 2  | Negative | Positive | Missing | (all) |  |                   |
| Negative | Negative | 121      | 6        | 80      | 207   |  | 38.65%            |
| Negative | Positive | 1        | 19       | 11      | 31    |  | 35.48%            |
| Negative | Missing  | 32       | 7        | 119     | 158   |  |                   |
| Negative | (all)    | 154      | 32       | 210     | 396   |  | 53.03%            |
| Positive | Negative | 3        | 0        | 1       | 4     |  |                   |
| Positive | Positive | 3        | 59       | 20      | 82    |  | 24.39%            |
| Positive | Missing  | 0        | 15       | 38      | 53    |  |                   |
| Positive | (all)    | 6        | 74       | 59      | 139   |  | 42.45%            |
| (all)    | (all)    | 160      | 106      | 269     | 535   |  |                   |

## 3. Addis Health Care Workers (HCW) Missing Data by Result

A

|          | Round 2  |          |         |       |  | % Missing Round 2 |
|----------|----------|----------|---------|-------|--|-------------------|
| Round 1  | Negative | Positive | Missing | (all) |  |                   |
| Negative | 103      | 53       | 275     | 431   |  | 63.81%            |
| Positive | 5        | 22       | 25      | 52    |  | 48.08%            |
| Missing  | 56       | 48       | 0       | 104   |  |                   |
| (all)    | 164      | 123      | 300     | 587   |  |                   |

B

|          | Round 3  |          |         |       |  | % Missing Round 3 |
|----------|----------|----------|---------|-------|--|-------------------|
| Round 2  | Negative | Positive | Missing | (all) |  |                   |
| Negative | 28       | 27       | 109     | 164   |  | 66.46%            |
| Positive | 6        | 22       | 95      | 123   |  | 77.24%            |
| Missing  | 18       | 13       | 269     | 300   |  |                   |
| (all)    | 52       | 62       | 473     | 587   |  |                   |

C

|          |          | Round 3  |          |         |       |  | % Missing Round 3 |
|----------|----------|----------|----------|---------|-------|--|-------------------|
| Round 1  | Round 2  | Negative | Positive | Missing | (all) |  |                   |
| Negative | Negative | 19       | 12       | 72      | 103   |  | 69.90%            |
| Negative | Positive | 4        | 4        | 45      | 53    |  | 84.91%            |
| Negative | Missing  | 17       | 11       | 247     | 275   |  | 89.82%            |
| Negative | (all)    | 40       | 27       | 364     | 431   |  | 84.45%            |
| Positive | Negative | 0        | 1        | 4       | 5     |  |                   |
| Positive | Positive | 0        | 4        | 18      | 22    |  | 81.82%            |
| Positive | Missing  | 1        | 2        | 22      | 25    |  | 88.00%            |
| Positive | (all)    | 1        | 7        | 44      | 52    |  | 84.62%            |
| Missing  | Negative | 9        | 14       | 33      | 56    |  |                   |
| Missing  | Positive | 2        | 14       | 32      | 48    |  |                   |
| Missing  | (all)    | 11       | 28       | 65      | 104   |  |                   |
| (all)    | (all)    | 52       | 62       | 473     | 587   |  |                   |

#### 4. Addis Community (combined for Ketema and Yeka)

**A**

| Round1   | Round2   |          |         | (all) | % Missing Round 2 |
|----------|----------|----------|---------|-------|-------------------|
|          | Negative | Positive | Missing |       |                   |
| Negative | 84       | 22       | 62      | 168   | 36·90%            |
| Positive | 5        | 92       | 68      | 165   | 41·21%            |
| Missing  | 48       | 36       | 259     | 343   |                   |
| (all)    | 137      | 150      | 389     | 676   |                   |

**B**

| Round2   | Round3   |          |         | (all) | % Missing Round 3 |
|----------|----------|----------|---------|-------|-------------------|
|          | Negative | Positive | Missing |       |                   |
| Negative | 11       | 10       | 116     | 137   | 84·67%            |
| Positive | 12       | 40       | 98      | 150   | 65·33%            |
| Missing  | 112      | 185      | 92      | 389   |                   |
| (all)    | 135      | 235      | 306     | 676   |                   |

**C**

| Round1   | Round2   | Round3   |          |         | (all) | % Missing Round 3 |
|----------|----------|----------|----------|---------|-------|-------------------|
|          |          | Negative | Positive | Missing |       |                   |
| Negative | Negative | 9        | 6        | 69      | 84    | 82·14%            |
| Negative | Positive | 0        | 5        | 17      | 22    | 77·27%            |
| Negative | Missing  | 14       | 15       | 33      | 62    | 53·23%            |
| Negative | (all)    | 23       | 26       | 119     | 168   | 70·83%            |
| Positive | Negative | 1        | 1        | 3       | 5     |                   |
| Positive | Positive | 8        | 29       | 55      | 92    | 59·78%            |
| Positive | Missing  | 3        | 6        | 59      | 68    | 86·76%            |
| Positive | (all)    | 12       | 36       | 117     | 165   | 70·91%            |
| Missing  | Negative | 1        | 3        | 44      | 48    |                   |
| Missing  | Positive | 4        | 6        | 26      | 36    |                   |
| Missing  | Missing  | 95       | 164      | 0       | 259   |                   |
| Missing  | (all)    | 100      | 173      | 70      | 343   |                   |
| (all)    | (all)    | 135      | 235      | 306     | 676   |                   |

#### 5. Seroprevalence among complete cases for Jimma

| Complete cases | Round | Observed Individuals | Seropositivity | Estimated Seroprevalence reported in manuscript |
|----------------|-------|----------------------|----------------|-------------------------------------------------|
| Jimma HCW      | 1     | 360                  | 30·60%         | 30·8% (26·9%, 34·8%)                            |
|                | 2     | 360                  | 45·80%         | 45·6% (41·0%, 50·3%)                            |
|                | 3     | 360                  | 56·90%         | 56·1% (51·1%, 61·1%)                            |
| Jimma Urban    | 1     | 132                  | 38·60%         | 32·3% (27·0%, 37·9%)                            |
|                | 2     | 132                  | 47·00%         | 40·8% (33·9%, 47·9%)                            |
|                | 3     | 132                  | 47·00%         | 45·2% (37·7%, 52·7%)                            |
| Jimma Rural    | 1     | 80                   | 17·50%         | 18·0% (13·5%, 23·2%)                            |
|                | 2     | 80                   | 25·00%         | 26·3% (19·1%, 34·3%)                            |
|                | 3     | 80                   | 27·50%         | 31·0% (22·3%, 40·3%)                            |

#### Supplementary References

- McElreath R. Statistical Rethinking: A Bayesian Course With Examples in R and Stan. Chapman & Hall/CRC, 2016 [https://books.google.com/books/about/Statistical\\_Rethinking.html?hl=&id=d7fCsgEACAAJ](https://books.google.com/books/about/Statistical_Rethinking.html?hl=&id=d7fCsgEACAAJ).
- Bürkner P-C. brms: An R Package for Bayesian Multilevel Models Using Stan. Journal of Statistical Software. 2017; **80**. DOI:10.18637/jss.v080.i01.
- Bürkner P-C. Advanced Bayesian Multilevel Modeling with the R Package brms. The R Journal. 2018; **10**: 395–411.
- Gudina EK, Ali S, Girma E, *et al*. Supplementary code and models for ‘Silent spread of SARS-CoV-2 in Ethiopia: Longitudinal cohort study among frontline healthcare workers and community’. 2021; published online June 7. DOI:10.5281/zenodo.4885064.
- Ahmad Z, Arif M, Ali F, Khan I, Nisar K S. A report on COVID-19 epidemic in Pakistan using SEIR fractional model. *Scientific Reports* 2020; **10**: 22268.
- Annas S, Pratama M I, Rifandi M, Sanusi W, Side S. Stability analysis and numerical simulation of SEIR model for pandemic COVID-19 spread in Indonesia. *Chaos, Solitons & Fractals* 2020; **139**: 110072.
- Grimm V, Mengel F, Schmidt M. Extensions of the SEIR model for the analysis of tailored social distancing and tracing approaches to cope with COVID-19. *Scientific Reports* 2021; **11**: 4214.
- López L, Rodó X. A modified SEIR model to predict the COVID-19 outbreak in Spain and Italy: Simulating control scenarios and multi-scale epidemics. *Results in Physics* 2021; **21**: 103746.
- Prem K, Liu Y, Russell T W, Kucharski A J, *et al*. The effect of control strategies to reduce social mixing on outcomes of the COVID-19 epidemic in Wuhan, China: a modelling study. *The Lancet Public Health* 2020; **5**: e261–e270.



- 10 Raimúndez E, Dudkin E, Vanhoefer J, *et al.* COVID-19 outbreak in Wuhan demonstrates the limitations of publicly available case numbers for epidemiological modeling. *Epidemics* 2021; **34**: 100439.
- 11 Kissler SM, Fauver JR, Mack C, *et al.* Densely sampled viral trajectories suggest longer duration of acute infection with B.1.1.7 variant relative to non-B.1.1.7 SARS-CoV-2. *medRxiv* 2021. DOI:10.1101/2021.02.16.21251535.
- 12 Keating SM, Waltemath D, König M, *et al.* SBML Level 3: an extensible format for the exchange and reuse of biological models. *Mol Syst Biol* 2020; **16**: e9110.
- 13 Schmiester L, Schälte Y, Bergmann FT, *et al.* PETA—Interoperable specification of parameter estimation problems in systems biology. *PLOS Computational Biology*. 2021; **17**: e1008646.
- 14 Fang Z, Zhang Y, Hang C, Ai J, Li S, Zhang W. Comparisons of viral shedding time of SARS-CoV-2 of different samples in ICU and non-ICU patients. *J. Infect.* 2020; **81**: 147–78.
- 15 McAloon C, Collins Á, Hunt K, *et al.* Incubation period of COVID-19: a rapid systematic review and meta-analysis of observational research. *BMJ Open* 2020; **10**: e039652.
- 16 Schälte Y, Fröhlich F, Stapor P, *et al.* ICB-DCM/pyPESTO: pyPESTO 0.2.6. Zenodo, 2021; published online May DOI:10.5281/ZENODO.4768592.
- 17 Fröhlich F, Weindl D, Schälte Y, *et al.* AMICI: High-Performance Sensitivity Analysis for Large Ordinary Differential Equation Models. *Bioinformatics* 2021; published online April. DOI:10.1093/bioinformatics/btab227.
